# Supplementary material
Source: ML conference proceedings conference paper supplement (https://openreview.net/forum?id=uHdVI3QMr6)
Supplement: supplementary_material [file attachment]

# A Dual Approach to Imitation Learning from Observations with Offline Datasets

Anonymous Author(s)

Affiliation

Address

email

**Abstract:** Demonstrations are an effective alternative to task specification for learning agents in settings where designing a reward function is difficult. However, demonstrating expert behavior in the action space of the agent becomes unwieldy when robots have complex, unintuitive morphologies. We consider the practical setting where an agent has a dataset of prior interactions with the environment and is provided with observation-only expert demonstrations. Typical *learning from observations* approaches have required either learning an inverse dynamics model or a discriminator as intermediate steps of training. Errors in these intermediate one-step models compound during downstream policy learning or deployment. We overcome these limitations by directly learning a multi-step utility function that quantifies how each action impacts the agent’s divergence from the expert’s visitation distribution. Using the principle of duality, we derive DIL0 (Dual Imitation Learning from Observations), an algorithm that can leverage arbitrary suboptimal data to learn imitating policies without requiring expert actions. DIL0 reduces the learning from observations problem to that of simply learning an actor and a critic, bearing similar complexity to vanilla offline RL. This allows DIL0 to gracefully scale to high dimensional observations, and demonstrate improved performance across the board.

**Keywords:** Learning from Observations, Imitation Learning

## 1 Introduction

Imitation Learning [1] holds the promise of leveraging a few expert demonstrations to train performant agents. This setting is also motivated by literature in behavioral and cognitive sciences [2, 3] that studies how humans learn by imitation, for instance mimicking other humans or watching tutorial videos. While this is often the motivation, many imitation learning methods [4, 5, 6, 7, 8] typically either deal with an impractical setting where the learning agent is allowed to interact with the environment as often as needed. We posit that the main reason humans can imitate efficiently is due to their knowledge priors from previous interactions with the environment; humans are able to distill skills from prior interactions to solve a desired task. Examples of expert behavior are commonly available through the ever-increasing curated multi-robot or cross-embodied datasets and even through tutorial videos. However, leveraging these expert datasets efficiently presents two challenges: (a) The expert data often comes in the form of observation trajectories lacking action information (e.g. tutorial videos in the same observation space as agent, cross-embodiment demonstrations, etc.) (b) The learning agent should be able to leverage its collected dataset of environment interactions to efficiently adapt to the expert’s behavior. These challenges serve as our key motivation to bring imitation learning closer to these practical settings. We consider the setup of offline imitation learning from observations, where the agent has access to an offline dataset of its own action-labeled transitions of arbitrary quality, and is provided with potentially few task-relevant expert demonstrations in the form of observation trajectories.

LfO has been widely studied [9, 10, 11, 12] in the online setting, where the agent is allowed to interact with the environment, and those methods are often extended to the offline setting. A Submitted to the 8th Conference on Robot Learning (CoRL 2024). Do not distribute.



## 77 2 Related Work

78 **Learning from Observations:** Imitation Learning from Observations (LfO) considers the setting  
 79 where the expert trajectories are available in the form of observations but missing action labels. This  
 80 setting is more practical as performant algorithms developed for LfO can unlock learning from a  
 81 plethora of video datasets and develop ways to transfer skills across embodiments. Unfortunately,  
 82 learning from observations alone has been shown to be provably more difficult compared to the  
 83 setting where expert actions are available [21]. As a result, current methods in LfO restrict themselves  
 84 to small observation spaces and involve complicated learning algorithms that first train a model  
 85 using offline interaction data to either predict expert actions [22, 11, 23] or learn a state-only reward  
 86 function [11, 13] in the form of a discriminator. This learned model is used for subsequent Behavior  
 87 Cloning, as in BCO [16], or for RL [13, 11]. As a result, prior methods suffer from compounding  
 88 errors either during training or deployment. The issue of compounding errors in the offline setting  
 89 with BC approaches or RL with a learned reward function has been investigated theoretically and  
 90 empirically in prior works [24, 25, 15]. These errors can be fixed with repeated online interaction,  
 91 but can lead to substantially poor performance in the offline setting.

92 **Duality in RL and IL:** The duality perspective in reinforcement learning has been explored in  
 93 the early works of [26, 27] and has gained recent popularity in the form of Dual RL [28, 29]  
 94 and DICE [30, 31, 32, 33, 34, 35] methods. Dual approaches formulate RL as a convex program  
 95 under linear constraints and leverage the Lagrangian or the Fenchel Rockefeller duality to obtain an  
 96 unconstrained and principled objective for RL. The appeal of the dual perspective stems from the  
 97 ability of dual approaches to learn from arbitrary off-policy data without being sensitive to distribution  
 98 shift or losing sample efficiency as traditional off-policy methods [36, 37]. This behavior is attributed  
 99 to the fact that dual approaches compute the on-policy policy gradient using off-policy data in contrast  
 100 to traditional off-policy methods, which perform Bellman backups uniformly over state space. Duality  
 101 has been previously leveraged in imitation [35, 13, 11] learning from observations by first creating  
 102 an upper bound to the distribution matching objective of imitation learning such that it resembles a  
 103 (return maximization) RL objective and then solving it using dual RL algorithms.

## 104 3 Preliminaries

105 We consider a learning agent in a Markov Decision Process (MDP) [38, 39] which is defined as  
 106 a tuple:  $\mathcal{M} = (\mathcal{S}, \mathcal{A}, p, R, \gamma, d_0)$  where  $\mathcal{S}$  and  $\mathcal{A}$  denote the state and action spaces respectively,  
 107  $p$  denotes the transition function with  $p(s'|s, a)$  indicating the probability of transitioning from  $s$   
 108 to  $s'$  taking action  $a$ ;  $R$  denotes the reward function and  $\gamma \in (0, 1)$  specifies the discount factor.  
 109 The reinforcement learning objective is to obtain a policy  $\pi : \mathcal{S} \rightarrow \Delta(\mathcal{A})$  that maximizes expected  
 110 return:  $\mathbb{E}_\pi \left[ \sum_{t=0}^{\infty} \gamma^t r(s_t, a_t) \right]$ , where we use  $\mathbb{E}_\pi$  to denote the expectation under the distribution  
 111 induced by  $a_t \sim \pi(\cdot|s_t)$ ,  $s_{t+1} \sim p(\cdot|s_t, a_t)$  and  $\Delta(\mathcal{A})$  denotes a probability simplex supported  
 112 over  $\mathcal{A}$ .  $f$ -divergences define a measure of distance between two probability distributions given by  
 113  $D_f(P\|Q) = \mathbb{E}_{x \sim Q} \left[ f\left(\frac{P(x)}{Q(x)}\right) \right]$  where  $f$  is a convex function.

114 **Visitation distributions and Dual RL:** The visitation distribution in RL is defined as the discounted  
 115 probability of visiting a particular state under policy  $\pi$ , i.e  $d^\pi(s, a) = (1 - \gamma)\pi(a|s) \sum_{t=0}^{\infty} \gamma^t P(s_t =$   
 116  $s|\pi)$  and uniquely characterizes the policy  $\pi$  that achieves the visitation distribution as follows:  
 117  $\pi(a|s) = \frac{d^\pi(s, a)}{\sum_a d^\pi(s, a)}$ . Our proposed objective is motivated by the recently proposed Dual-V class  
 118 of Dual RL [28] methods where regularized RL with conservatism parameter  $\alpha$  is formulated as a  
 119 convex program with state-only constraints:

$$\begin{aligned} & \max_{d \geq 0} \mathbb{E}_{d(s, a)}[r(s, a)] - \alpha D_f(d(s, a) \parallel d^O(s, a)) \\ & \text{s.t. } \sum_{a \in \mathcal{A}} d(s, a) = (1 - \gamma)d_0(s) + \gamma \sum_{(s', a') \in \mathcal{S} \times \mathcal{A}} d(s', a') p(s|s', a'), \quad \forall s \in \mathcal{S}. \end{aligned} \quad (1)$$

120 The above objective is constrained and difficult to optimize, but the Lagrangian dual of the above  
 121 objective presents an unconstrained optimization that results in a performant Dual-RL algorithm.

$$\min_V (1 - \gamma) \mathbb{E}_{s \sim d_0} [V(s)] + \alpha \mathbb{E}_{(s,a) \sim d^O} \left[ f_p^* \left( \left( r(s,a) + \gamma \sum_{s'} p(s'|s,a) V(s') - V(s) \right) / \alpha \right) \right], \quad (2)$$

where  $f_p^*(y) = \max_{x \in \mathbb{R}} \langle x \cdot y \rangle - f(x)$  s.t  $x \geq 0$ . Our proposed method builds upon and extend this formulation to an action-free LfO setting.

**Imitation Learning from Observations:** In the setting of Learning from observation-only expert demonstrations, the expert provides state-only trajectories:  $\mathcal{D}^{\mathcal{E}} = \{[s_0^0, s_1^0, \dots, s_h^0], \dots, [s_0^n, s_1^n, \dots, s_h^n]\}$ . Our work focuses on the offline setting where in addition to the expert observation-trajectories, we have access to an *offline interaction data* that consists of potentially suboptimal reward-free  $\{s, a, s'\}$  transitions coming from the learning agent’s prior interaction with the environments. We denote the offline dataset by  $d^O$  consisting of  $\{\text{state, action, next-state}\}$  tuples and  $\rho(s, a, s')$  as the corresponding visitation distribution of the offline dataset. Distribution matching techniques aim to match the state visitation distribution of the offline dataset. Distribution matching techniques aim to match the state visitation distribution of the agent to that of expert. Although we use  $s$  as a placeholder for states, the method directly extends to fully-observable MDP’s where we perform visitation distribution matching in the common observation space of expert and agent.

## 4 Dual Imitation Learning from Observations

Classical offline LfO approaches that rely on learning a discriminator and using it as a psuedoreward for downstream RL are susceptible to discriminator errors compounding over timesteps during value bootstrapping in RL [40, 21, 41, 15]. The discriminator is likely to overfit with limited data especially when expert observations are limited or high dimensional. Methods that learn IDM and use behavior cloning (BC) only perform policy learning on expert states and suffer compounding errors during deployment as a result of ignoring the recovery behaviors that can be extracted from offline, even suboptimal datasets [24, 25]. The key idea of the work is to propose an objective that directly learns a utility function that quantifies how state transitions impact the agent’s long-term divergence from the expert’s visitation distribution. We derive our method below by first framing LfO as a specific visitation distribution matching problem and then leveraging duality to propose an action-free objective.

### 4.1 LfO as $\{s, s'\}$ Joint Visitation Distribution Matching

To derive our method, we first note a key observation, also leveraged by some prior works [10], that the next-state encodes the information about missing expert actions as the next-state is a stochastic function of the current state and action. We instantiate this insight in the form of a distribution matching objective. We define  $\{s, s'\}$  joint visitation distributions denoted by  $\tilde{d}^\pi(s, s', a') = (1 - \gamma) \pi(a'|s') \sum_{s_0 \sim d_0, a_t \sim \pi(s_t)} \gamma^t p(s_{t+1} = s', s_t = s | \pi)$ . Intuitively, it extends the definition of state-action visitation distribution by denoting the discounted probability of reaching the  $\{\text{state, next-state}\}$  pair under policy  $\pi$  and subsequently taking an action  $a'$ . Under this instantiation, the LfO problem reduces to finding a solution of:

$$\min_{\pi} \mathcal{D}_f(\tilde{d}^\pi(s, s', a') \| \tilde{d}^E(s, s', a')), \quad (3)$$

as at convergence,  $\tilde{d}^\pi(s, s', a') = \tilde{d}^E(s, s', a')$  holds, which implies  $\tilde{d}^\pi(s, s') = \tilde{d}^E(s, s')$  and also  $\tilde{d}^\pi(s) = \tilde{d}^E(s)$  by marginalizing distributions. Unfortunately, the above objective (a) requires computing an on-policy visitation distribution of current policy ( $\tilde{d}^\pi$ ) (b) provides no mechanism to incorporate offline interaction data ( $d^O$ ), and (c) requires knowing expert actions in the action space of the agent ( $a'$ ).

### 4.2 DILO: Leveraging Action-free Offline Interactions for Imitating Expert Observations

We now show how framing imitation (Eq. 3) as a constrained optimization objective w.r.t visitation distributions allows us to derive an action-free objective. First, in order to leverage offline interaction data  $\rho$ , we consider a surrogate convex mixture distribution matching objective with linear constraints:

$$\begin{aligned} & \max_{\tilde{d} \geq 0} -\mathcal{D}_f(\text{Mix}_\beta(\tilde{d}, \rho) \| \text{Mix}_\beta(\tilde{d}^E, \rho)) \\ & \text{s.t } \sum_{a''} \tilde{d}(s', s'', a'') = (1 - \gamma) \tilde{d}_0(s', s'') + \gamma \sum_{s, a' \in \mathcal{S} \times \mathcal{A}} \tilde{d}(s, s', a') p(s''|s', a'), \quad \forall s', s'' \in \mathcal{S} \times \mathcal{S}. \end{aligned} \quad (4)$$



The constraints above represent the *Bellman flow* conditions any valid joint visitation distribution needs to satisfy. The mixture distribution matching objective preserves the fixed point of optimization  $\tilde{d}^\pi(s, s', a') = \tilde{d}^E(s, s', a')$  irrespective of mixing parameter  $\beta$ , thus serving as a principled objective for LfO. Mixture distribution matching has been shown to be a theoretically and practically effective way [28, 42] of leveraging off-policy data. Prior works [28, 42] dealing with state-action visitation in the context of imitation learning consider an overconstrained objective resulting in a complex min-max optimization. Our work departs by choosing constraints that are necessary and sufficient while giving us a dual objective that is *action-free* as well as a simpler *single-player optimization*. The constrained objective is convex with linear constraints. An application of Lagrangian duality to the primal objective results in the following unconstrained dual objective we refer to as DILO:

$$\begin{aligned} \text{DILO: } \min_V \beta(1 - \gamma)\mathbb{E}_{\tilde{d}_0}[V(s, s')] + \mathbb{E}_{s, s' \sim \text{Mix}_\beta(\tilde{d}^E, \rho)}[f_p^*(\gamma\mathbb{E}_{s'' \sim p(\cdot|s', a')}[V(s', s'')] - V(s, s'))] \\ - (1 - \beta)\mathbb{E}_{s, s' \sim \rho}[\gamma\mathbb{E}_{s'' \sim p(\cdot|s', a')}[V(s', s'')] - V(s, s')], \end{aligned} \quad (5)$$

where  $V$  is the Lagrange dual variable defined as  $V : \mathcal{S} \times \mathcal{S} \rightarrow \mathbb{R}$  and  $f_p^*$  is a variant of conjugate  $f^*$  defined as  $f_p^*(x) = \max(0, f'^{-1}(x))(x) - f(\max(0, f'^{-1}(x)))$ . We derive DILO objective as Theorem 6.1 in Appendix 6.2 where we also see that strong duality holds and the dual objective can recover the same optimal policy with the added benefit of being action-free. Moreover, we show that the solution to the dual objective in Equation 5,  $V^*(s, s')$  represents the discounted utility of transitioning to a state  $s$  from  $s'$  under the optimal imitating policy that minimizes the  $f$ -divergence with the expert visitation [43] (Appendix 6.2.2). Intuitively, this holds as the primal objective in Eq 4 can be rewritten as the reward maximization problem  $\mathbb{E}_{\text{Mix}_\beta(\tilde{d}, \rho)}[r(s, s', a')]$  with  $r(s, s', a') = -\frac{\text{Mix}_\beta(\tilde{d}, \rho)}{\text{Mix}_\beta(\tilde{d}^E, \rho)} f(\frac{\text{Mix}_\beta(\tilde{d}, \rho)}{\text{Mix}_\beta(\tilde{d}^E, \rho)})$ . This reward function can be thought of as penalizing the policy every time it takes an action leading to a different next state-action than the expert's implied policy in agent's action space.

An empirical estimator for the DILO objective in Eq. 5 only requires sampling  $s, s', s''$  under a mixture offline dataset and expert dataset and no longer requires knowing any of the actions that induced those transitions. This establishes DILO as a principled action-free alternative to optimizing the occupancy matching objective for offline settings.

### 4.3 Policy Extraction and Practical Algorithm

To instantiate our algorithm, we use the Pearson Chi-square divergence ( $f(x) = (x - 1)^2$ ) which has been found to lead to stable DICE and Dual-RL algorithms in the past [7]. With the Pearson chi-square divergence,  $f_p^*$  takes the form  $f_p^*(x) = x * (\max(\frac{x}{2} + 1), 0) - ((\max(\frac{x}{2} + 1), 0) - 1)^2$ . We outline the intuition of the resulting objective after substituting Pearson chi-square divergence in Appendix 6.2.4.

At convergence, the DILO objective does not directly give us the optimal policy  $\pi^*$  but rather provides us with a utility function  $V^*(s, s')$  that quantifies the utility of transitioning to state  $s'$  from  $s$  in visitation distribution matching. To recover the policy, we use value-weighted regression on the offline interaction dataset, which has been shown [44, 45, 46] to provably maximize the  $V$  function (thus taking action to minimize divergence with expert's visitation) while subject to distribution constraint of offline dataset:

$$\mathcal{L}(\psi) = -\mathbb{E}_{s, a, s' \sim \rho}[e^{\tau V^*(s, s')} \log \pi_\psi(a|s)]. \quad (6)$$

**Choice of  $\tilde{d}_0(s, s')$ :** A distribution over state and next-state is implicitly dependent on the policy that induces the next-state. This initial distribution in Eq. 5 forms the distribution over states from which the learned policy will acquire effective imitation behavior to mimic the expert. In our work, we set  $\tilde{d}_0(s, s')$  to be the uniform distribution over replay buffer  $\{s, s'\}$  pairs, ensuring that the learned policy is robust enough to imitate from any starting transition observed from all the transitions available to us.

## Practical optimization difficulty of dual objectives:

Prior works in reinforcement learning that have leveraged a dual objective based on Bellman-flow constraints suffer from learning instabilities under gradient descent. Intuitively, in our case, learning instability arises as the gradients from  $V(s, s')$  and  $V(s', s'')$  can conflict if the network learns similar feature representations for nearby states due to feature co-adaptation [47]. Prior works [28] have resorted to using semi-gradient approaches but do not converge provably to the optimal solution [29]. To sidestep this issue, we leverage the orthogonal gradient update proposed by ODICE [29] for the offline RL setting that fixes the conflicting gradient by combining the projection of the gradient of  $V(s', s'')$  on  $V(s, s')$  and the orthogonal component in a principled manner. We refer to the ODICE work for detailed exposition. Our complete practical algorithm can be found in Algorithm 1.

### Algorithm 1: DILO

---

```

1: Init  $V_\phi, \pi_\psi$ 
2: Params: temperature  $\tau$ , mixture ratio  $\beta$ 
3: Let  $\mathcal{D} = \hat{\rho} = \{(s, a, s')\}$  be an offline dataset and  $\mathcal{D}^\mathcal{E} = \{s, s'\}$  be expert demonstrations dataset.
4: for  $t = 1..T$  iterations do
5:   Train  $V_\phi$  via Orthogonal gradient update on Eq. 5
6:   Update  $\pi_\psi$  by minimizing Eq. 6
7: end for

```

---

## 5 Experiments

In our experiments, first, we aim to understand where the prior LfO methods based on IDM or a discriminator fail and how the performance of DILO compares to baselines under a diverse set of datasets. Our experiments with proprioceptive observations consider an extensive set of 24 datasets. The environments span locomotion and manipulation tasks, containing complex tasks such as 24-DoF dextrous manipulation. Second, we examine if the simplicity of DILO objective indeed enables it to scale directly to mimic expert image observation trajectories. Finally, we test our method on a set of real-robot manipulation tasks where we consider learning from a few expert observations generated by human teleoperation as well as cross-embodied demos demonstrated by humans as videos.

### 5.1 Offline Imitation from Observation Benchmarking

We use offline imitation benchmark task from [28, 13] where the datasets are sourced from D4RL [19] and generated in MuJoCo simulator [18]. For locomotion tasks, the benchmark generates an offline interaction dataset consisting of 1-million transitions from random or medium datasets mixed with 200 expert trajectories (30 expert trajectory in the few-expert setting). For manipulation environments, we have suboptimal datasets comprising of 30 expert trajectories mixed with human or cloned datasets from D4RL. The expert demonstrates 1 observation trajectory for all tasks. DILO uses a single set of hyperparameters across all environments listed in Appendix 6.3.1.

| Suboptimal Dataset | Env         | Access to expert actions |                |                 |                    |              | No expert actions |                    |                     | Expert |
|--------------------|-------------|--------------------------|----------------|-----------------|--------------------|--------------|-------------------|--------------------|---------------------|--------|
|                    |             | RCE                      | BC expert data | BC full dataset | IQ-Learn (offline) | ReCOIL       | ORIL              | SMODICE            | DILO                |        |
| random+expert      | hopper      | 51.41±38.63              | 4.52±1.42      | 5.64±4.83       | 1.85±2.19          | 108.18±3.28  | 75.21±21.90       | <b>100.46±0.64</b> | <b>97.87±8.11</b>   | 111.33 |
|                    | halfcheetah | 64.19±11.06              | 2.2±0.01       | 2.25±0.00       | 4.83±7.99          | 47.65±16.95  | 60.49±3.53        | 85.16±3.62         | <b>91.18±0.24</b>   | 88.83  |
|                    | walker2d    | 20.90±26.80              | 0.86±0.61      | 0.91±0.5        | 0.57±0.09          | 102.16±7.19  | 27.02±23.49       | <b>108.41±0.47</b> | <b>108.42±0.64</b>  | 106.92 |
|                    | ant         | 105.38±14.15             | 5.17±5.43      | 30.66±1.35      | 42.23±20.05        | 126.74±4.63  | 54.19±27.60       | <b>122.56±4.47</b> | <b>122.15±5.15</b>  | 130.75 |
| random+few-expert  | hopper      | 25.31±18.97              | 4.84±3.83      | 3.0±0.54        | 1.37±1.23          | 97.85±17.89  | 29.86±22.60       | 78.80±3.09         | <b>93.73±7.59</b>   | 111.33 |
|                    | halfcheetah | 2.99±1.07                | -0.93±0.35     | 2.24±0.01       | 1.14±1.94          | 76.92±7.53   | 25.76±9.52        | 4.10±1.50          | <b>52.32±10.72</b>  | 88.83  |
|                    | walker2d    | 40.49±26.52              | 0.98±0.83      | 0.74±0.20       | 0.39±0.27          | 83.23±19.00  | 3.22±3.29         | <b>107.18±1.87</b> | <b>108.42±0.25</b>  | 106.92 |
|                    | ant         | 67.62±15.81              | 0.91±3.93      | 35.38±2.66      | 32.99±3.12         | 67.14±8.30   | 36.52±9.37        | -8.89±39.12        | <b>117.50±4.75</b>  | 130.75 |
| medium+expert      | hopper      | 58.71±34.06              | 16.09±12.80    | 59.25±3.71      | 12.90±24.00        | 88.51±16.73  | 14.15±18.24       | 54.28±3.78         | <b>99.97±12.62</b>  | 111.33 |
|                    | halfcheetah | 65.14±13.82              | -1.79±0.22     | 42.45±0.42      | 25.67±20.82        | 81.15±2.84   | 65.28±7.17        | 56.91±4.08         | <b>90.47±0.64</b>   | 88.83  |
|                    | walker2d    | 96.24±14.04              | 2.43±1.82      | 72.76±3.82      | 59.37±30.14        | 108.54±1.81  | 28.32±27.82       | 3.11±2.41          | <b>77.16±6.96</b>   | 106.92 |
|                    | ant         | 86.14±38.59              | 0.86±7.42      | 95.47±10.37     | 37.17±41.15        | 120.36±7.67  | 49.14±14.92       | <b>103.67±3.44</b> | <b>102.89±3.57</b>  | 130.75 |
| medium few-expert  | hopper      | 66.15±35.16              | 7.37±1.13      | 46.87±5.31      | 11.05±20.59        | 50.01±10.36  | 11.67±14.82       | <b>44.61±6.08</b>  | <b>41.80±14.81</b>  | 111.33 |
|                    | halfcheetah | 61.14±18.31              | -1.15±0.06     | 42.21±0.06      | 26.27±20.24        | 75.96±4.54   | 59.11±4.74        | 44.66±0.95         | <b>74.71±6.35</b>   | 88.83  |
|                    | walker2d    | 85.28±34.90              | 2.02±0.72      | 70.42±2.86      | 73.30±2.85         | 91.25±17.63  | 6.81±6.76         | 6.00±6.69          | <b>66.64±6.05</b>   | 106.92 |
|                    | ant         | 67.95±36.78              | -10.45±1.63    | 81.63±6.67      | 35.12±50.56        | 110.38±10.96 | 67.18±30.45       | <b>90.30±2.23</b>  | <b>88.03±9.01</b>   | 130.75 |
| cloned+expert      | pen door    | 19.60±11.40              | 13.95±11.04    | 34.94±11.10     | 2.18±8.75          | 95.04±4.48   | 0.92±4.51         | 13.29±13.57        | <b>101.36±3.48</b>  | 106.42 |
|                    | hammer      | 0.08±0.15                | -0.22±0.05     | 0.01±0.00       | 0.07±0.02          | 102.75±4.05  | -0.32±0.01        | 1.45±2.23          | <b>105.60±0.28</b>  | 103.94 |
| human+expert       | pen door    | 1.95±3.89                | 2.41±4.48      | 5.45±7.84       | 0.27±0.02          | 95.77±17.90  | 0.26±0.01         | 0.00±0.10          | <b>112.55±22.10</b> | 125.71 |
|                    | hammer      | 17.81±5.91               | 13.83±10.76    | 90.76±25.09     | 14.29±28.82        | 103.72±2.90  | 5.76±3.85         | -3.33±12.12        | <b>88.61±14.30</b>  | 106.42 |
| partial+expert     | pen door    | -0.05±0.05               | -0.03±0.05     | 103.71±1.22     | 5.6±7.29           | 104.70±0.55  | -0.32±0.01        | -0.12±0.16         | <b>101.51±0.99</b>  | 103.94 |
|                    | hammer      | 5.00±5.64                | 0.18±0.14      | 122.61±4.85     | -0.32±1.38         | 125.19±3.29  | 3.11±0.04         | 0.40±0.48          | <b>117.52±8.55</b>  | 125.71 |
| mixed+expert       | kitchen     | 6.875±9.24               | 2.5±5.0        | 45.5±1.87       | 0.0±0.0            | 60.0±5.70    | 0.00±0.00         | 35.0±4.08          | <b>43.0±5.30</b>    | 75.0   |
|                    | kitchen     | 1.66±2.35                | 2.2±3.8        | 42.1±1.12       | 0.0±0.0            | 52.0±1.0     | 0.00±0.00         | <b>48.33±4.24</b>  | <b>44.0±8.30</b>    | 75.0   |

Table 1: The normalized return obtained by different offline IL (both provided with and without expert actions) methods on the D4RL suboptimal datasets with 1 expert trajectory. The mean and std statistics are obtained over 5 random seeds. Methods with avg. perf within the 1 std-dev of the top-performing method are highlighted.

**Baselines:** We compare DIL0 against offline imitation from observations (LfO) methods such as ORIL [48], SMODICE [13] as well as offline imitation from action-labelled demonstration (LfD) methods like BC [49], IQ-Learn [50] and ReCOIL [28]. We choose these imitation learning methods as they represent the frontier of the LfO and LfD setting, outperforming methods like ValueDICE [42] and DemoDICE [34] as shown in prior works. Intuitively, the imitation from action-labeled demonstrations represents the upper bound of performance as they have additional information on expert actions even though sometimes we observe LfO algorithms to surpass them in performance. ORIL and SMODICE first learn a discriminator and, subsequently run downstream RL treating the discriminator as the expert pseudo-reward.

Table 1 shows the cumulative return of different algorithms under the ground truth expert reward function that is unavailable to the learning agent during training. DIL0 demonstrates improved performance across a wide range of datasets. Particularly in the setting of few-expert observations or high dimensional observations like dextrous manipulation, the performance of methods relying on a learned discriminator falls sharply potentially due to overfitting of discrimination that results in compounding downstream errors. DIL0 gets rid of this intermediate step, completely reducing the problem of LfO to a similar training setup as a traditional actor-critic algorithm. BC methods, representing an upper bound to BCO [16] shows poor performance even without a learned IDM.

## 5.2 Imitating from Expert Image Observations

Learning to mimic expert in the image observation space presents a difficult problem, especially in the absence of a pretrained representations. To evaluate our algorithm in this setting, we consider the Robomimic datasets [20] which gives the flexibility of choice to use image observations or the corresponding proprioceptive states for learning. Our suboptimal datasets comprises of Multi-Human (MH), Machine Generated (MG) datasets from Robomimic without access to expert trajectories. We obtain 50 expert-observation trajectories from Proficient Human (PH) datasets. This setup is more complicated as the agent has to learn expert actions purely from OOD datasets and match expert visitations. We consider the most performant LfO baseline from the previous section SMODICE [13] along with a BCO [16] baseline as BCO has shown success in scaling up to image observations [51].

Fig 2 shows the result of these approaches on 4-different datasets using both state and image observations. SMODICE shows competitive results when learning from state-observations but does not scale up well to images likely due to the overfitting of the discriminator in high-dimensional space. BCO fails consistently across both state and image experiments as learning an IDM is challenging in this task with contacts, and any mistake by IDM can compound. DIL0 outperforms baselines and demonstrates improved performance across both state and image observations.



|                   |         | Lift-MG            | Lift-MH            | Can-MG             | Can-MH             |
|-------------------|---------|--------------------|--------------------|--------------------|--------------------|
| State<br>50 Demos | BCO     | 0.00 ± 0.00        | 0.00 ± 0.00        | 0.00 ± 0.00        | 0.00 ± 0.00        |
|                   | SMODICE | 0.41 ± 0.02        | 0.46 ± 0.1         | <b>0.54 ± 0.01</b> | 0.28 ± 0.01        |
|                   | DIL0    | <b>0.59 ± 0.03</b> | <b>0.97 ± 0.02</b> | <b>0.53 ± 0.02</b> | <b>0.64 ± 0.03</b> |
| Image<br>50 Demos | BCO     | 0.00 ± 0.00        | 0.00 ± 0.00        | 0.00 ± 0.00        | 0.00 ± 0.00        |
|                   | SMODICE | 0.21 ± 0.02        | 0.40 ± 0.12        | 0.10 ± 0.04        | 0.02 ± 0.01        |
|                   | DIL0    | <b>0.76 ± 0.08</b> | <b>0.94 ± 0.02</b> | <b>0.25 ± 0.02</b> | <b>0.15 ± 0.01</b> |

Figure 2: Side-by-side comparison of LfO methods on state-only imitation vs image-only imitation. DIL0 shows noticeable improvement over existing LfO methods without hyperparameter tuning. Columns denote different suboptimal datasets.

## 5.3 Imitating from Human Trajectories for Robot Manipulation

**Setup:** Our setup utilizes a UR5e Robotic Arm on a tilted  $1.93\text{m} \times 0.76\text{m}$  Wind Chill air hockey table to hit a puck or manipulate tabletop objects. Puck detection utilizes an overhead camera, with additional environment details in Appendix 6.4. The set of tasks in this domain is designed to stress both 1) challenging inverse dynamics through complex striking motions and 2) partial state coverage through the wide variety of possible paddle × puck positions and velocities. While baselines can struggle with compounding errors in one or both of these settings DIL0’s theoretical properties allow it to scale gracefully to these complexities.

**Tasks and Datasets:** We consider three tasks and 9 datasets for real-world experiments. Our tasks are: 1) Safe Objective Manipulation: Navigate object safely to the goal without hitting obstacles. 2) Puck Striking: Hit a stationary puck 3) Dynamic Puck Hitting: A challenging task of hitting a dynamically

| Safe Object Manipulation                    |                  |             |             | Puck-Striking        |                      |
|---------------------------------------------|------------------|-------------|-------------|----------------------|----------------------|
|                                             | Few Trajectories | Fixed Start | Few Uniform | 20 expert            | 10 expert            |
| BCO                                         | 3/10             | 7/10        | <b>6/10</b> | 7/11                 | 4/11                 |
| SMODICE                                     | 2/10             | 1/10        | 0/10        | 5/11                 | 4/11                 |
| DIL0                                        | <b>8/10</b>      | <b>9/10</b> | 5/10        | <b>8/11</b>          | <b>5/11</b>          |
| Safe Object Manipulation (Cross-Embodiment) |                  |             |             | Dynamic Puck Hitting |                      |
|                                             | Few Trajectories | Fixed Start | Few Uniform | 400 expert (touch)   | 400 expert (hitting) |
| BCO                                         | 6/10             | 6/10        | <b>8/10</b> | 2/10                 | 0/10                 |
| SMODICE                                     | 1/10             | 1/10        | 1/10        | 6/10                 | 4/10                 |
| DIL0                                        | <b>8/10</b>      | <b>9/10</b> | <b>8/10</b> | <b>10/10</b>         | <b>9/10</b>          |

Figure 3: **Real Robot Experiments:** Table shows the (x/y) success rates as x successes in y trials for different methods on real-robot setup of air-hockey. For the dynamic puck-hitting task, we evaluate the number of touches made in addition to hitting behavior, which returns the puck in the opposite direction.

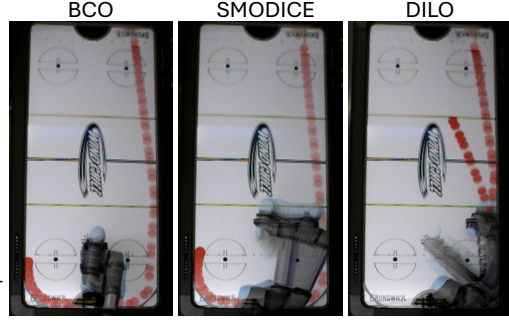

Figure 4: **Example of learned hitting behavior across algorithms:** Puck’s (red) gradient shows movement across time for Dynamics Puck Hitting.

moving puck. For the safe manipulation task, we investigate three datasets a) Few-Trajectories: 15 expert trajectory observations are given with uniform initial state b) Fixed-start-trajectories: 15 expert observation trajectories are provided to the agent with fixed start state. c) Few Uniform: 300 transitions are provided to the agent uniformly in state space. For Puck Striking tasks, we consider two observation datasets, one with 20 experts and the other with 10 experts. For Dynamic Puck hitting, we consider a dataset of 400 expert trajectories. The suboptimal datasets for all tasks contain the same amount of transitions as the expert dataset containing a mix of successes and failures. The datasets for all tasks are obtained by a teleoperation setup by humans, except for the cross-embodiment tasks where the humans demonstrate using their hands, and the state is detected using an overhead camera.

**Analysis:** Fig. 3 compares the success rate of Learning from Observation algorithms in settings with varying dynamics. Safe Object Manipulation presents a task with easy inverse dynamics modeling since the arm restricts its motion to move through the workspace. Consequently, BCO performs well when provided with good coverage of expert observations (few-uniform), but is still outperformed by DIL0 as a result of ignoring offline datasets to learn recovery behaviors. SMODICE shows poor performance consistently in tasks with small datasets—i.e. poor coverage. Puck striking presents both easy inverse dynamics and good state coverage, which may explain the comparable performance from BCO and SMODICE against DIL0. On the other hand, Dynamic Puck Hitting is challenging both for inverse dynamics, because of the wide range of actions necessary to hit a moving puck, and for state coverage, where the range of possible paddle and puck positions is substantial. Fig. 4 demonstrates an example of learned puck hitting behavior. DIL0 handles both complexities gracefully, resulting in an impressive success rate over both baselines.

## 6 Conclusion

Offline Imitation from Observations provides a solution for fast adaptation of the agent to a variety of expert behaviors agnostic of the agent’s action space. In this work, we propose a principled, computationally efficient, and empirically performant solution to this problem. Our work frames the problem as a particular distribution-matching objective capable of leveraging offline data. Using the principle of duality under a well-chosen but sufficient set of constraints, we derive an action-free objective whose training computational complexity is similar to an efficient offline RL algorithm. We show that the proposed method shows improved performance across a wide range of simulated and real datasets, learning from proprioceptive or image observations and cross-embodied expert demonstrations.

**Limitations:** Our proposed method is limited by the assumption of matching visitation distributions in the observation space of the agent and expert rather than a meaningful semantic space, but we hope that with improvement in universal representations, this limitation is lifted by distribution matching in compact representation space. Our work assumes that expert’s optimality, but in reality, experts demonstrate a wide range of biases. We leave this extension to future work. Finally, we demonstrate the failure modes of our method and further limitations in Appendix 6.5.

## References

- [1] S. Schaal. Is imitation learning the route to humanoid robots? *Trends in cognitive sciences*, 3 (6):233–242, 1999.
- [2] S. Vogt and R. Thomaschke. From visuo-motor interactions to imitation learning: behavioural and brain imaging studies. *Journal of sports sciences*, 25(5):497–517, 2007.
- [3] R. W. Byrne and A. E. Russon. Learning by imitation: A hierarchical approach. *Behavioral and brain sciences*, 21(5):667–684, 1998.
- [4] T. Ni, H. Sikchi, Y. Wang, T. Gupta, L. Lee, and B. Eysenbach. f-irl: Inverse reinforcement learning via state marginal matching. In *Conference on Robot Learning*, pages 529–551. PMLR, 2021.
- [5] C. Li, M. Vlastelica, S. Blaes, J. Frey, F. Grimmering, and G. Martius. Learning agile skills via adversarial imitation of rough partial demonstrations. In *Conference on Robot Learning*, pages 342–352. PMLR, 2023.
- [6] H. Sikchi, A. Saran, W. Goo, and S. Niekum. A ranking game for imitation learning. *arXiv preprint arXiv:2202.03481*, 2022.
- [7] F. Al-Hafez, D. Tateo, O. Arenz, G. Zhao, and J. Peters. Ls-iq: Implicit reward regularization for inverse reinforcement learning. *arXiv preprint arXiv:2303.00599*, 2023.
- [8] S. K. S. Ghasemipour, R. Zemel, and S. Gu. A divergence minimization perspective on imitation learning methods. In *Conference on Robot Learning*, pages 1259–1277. PMLR, 2020.
- [9] J. Ho and S. Ermon. Generative adversarial imitation learning. *Advances in neural information processing systems*, 29:4565–4573, 2016.
- [10] F. Torabi, G. Warnell, and P. Stone. Generative adversarial imitation from observation. *arXiv preprint arXiv:1807.06158*, 2018.
- [11] Z. Zhu, K. Lin, B. Dai, and J. Zhou. Off-policy imitation learning from observations. *Advances in Neural Information Processing Systems*, 33:12402–12413, 2020.
- [12] H. Hoshino, K. Ota, A. Kanazaki, and R. Yokota. Opirl: Sample efficient off-policy inverse reinforcement learning via distribution matching. In *2022 International Conference on Robotics and Automation (ICRA)*, pages 448–454. IEEE, 2022.
- [13] Y. J. Ma, A. Shen, D. Jayaraman, and O. Bastani. Smodice: Versatile offline imitation learning via state occupancy matching. *arXiv preprint arXiv:2202.02433*, 2022.
- [14] L. Lee, B. Eysenbach, E. Parisotto, E. Xing, S. Levine, and R. Salakhutdinov. Efficient exploration via state marginal matching. *arXiv preprint arXiv:1906.05274*, 2019.
- [15] H. Sikchi, R. Chitnis, A. Touati, A. Geramifard, A. Zhang, and S. Niekum. Score models for offline goal-conditioned reinforcement learning. *arXiv preprint arXiv:2311.02013*, 2023.
- [16] F. Torabi, G. Warnell, and P. Stone. Behavioral cloning from observation. *arXiv preprint arXiv:1805.01954*, 2018.
- [17] A. Edwards, H. Sahni, Y. Schroecker, and C. Isbell. Imitating latent policies from observation. In *International Conference on Machine Learning*, pages 1755–1763. PMLR, 2019.
- [18] E. Todorov, T. Erez, and Y. Tassa. Mujoco: A physics engine for model-based control. In *2012 IEEE/RSJ international conference on intelligent robots and systems*, pages 5026–5033. IEEE, 2012.



- [19] J. Fu, A. Kumar, O. Nachum, G. Tucker, and S. Levine. D4rl: Datasets for deep data-driven reinforcement learning. *arXiv preprint arXiv:2004.07219*, 2020.
- [20] A. Mandlekar, D. Xu, J. Wong, S. Nasiriany, C. Wang, R. Kulkarni, L. Fei-Fei, S. Savarese, Y. Zhu, and R. Martín-Martín. What matters in learning from offline human demonstrations for robot manipulation. *arXiv preprint arXiv:2108.03298*, 2021.
- [21] R. Kidambi, J. Chang, and W. Sun. Mobile: Model-based imitation learning from observation alone. *Advances in Neural Information Processing Systems*, 34, 2021.
- [22] F. Torabi, G. Warnell, and P. Stone. Adversarial imitation learning from state-only demonstrations. In *Proceedings of the 18th International Conference on Autonomous Agents and MultiAgent Systems*, pages 2229–2231, 2019.
- [23] W. Sun, A. Vemula, B. Boots, and D. Bagnell. Provably efficient imitation learning from observation alone. In *International conference on machine learning*, pages 6036–6045. PMLR, 2019.
- [24] S. Ross, G. Gordon, and D. Bagnell. A reduction of imitation learning and structured prediction to no-regret online learning. In *Proceedings of the fourteenth international conference on artificial intelligence and statistics*, pages 627–635. JMLR Workshop and Conference Proceedings, 2011.
- [25] G. Swamy, S. Choudhury, J. A. Bagnell, and S. Wu. Of moments and matching: A game-theoretic framework for closing the imitation gap. In *International Conference on Machine Learning*, pages 10022–10032. PMLR, 2021.
- [26] A. S. Manne. Linear programming and sequential decisions. *Management Science*, 6(3): 259–267, 1960.
- [27] E. V. Denardo. On linear programming in a markov decision problem. *Management Science*, 16(5):281–288, 1970.
- [28] H. Sikchi, Q. Zheng, A. Zhang, and S. Niekum. Dual rl: Unification and new methods for reinforcement and imitation learning. In *Sixteenth European Workshop on Reinforcement Learning*, 2023.
- [29] L. Mao, H. Xu, W. Zhang, and X. Zhan. Odice: Revealing the mystery of distribution correction estimation via orthogonal-gradient update. *arXiv preprint arXiv:2402.00348*, 2024.
- [30] O. Nachum, B. Dai, I. Kostrikov, Y. Chow, L. Li, and D. Schuurmans. Algaedice: Policy gradient from arbitrary experience. *arXiv preprint arXiv:1912.02074*, 2019.
- [31] O. Nachum, Y. Chow, B. Dai, and L. Li. Dualdice: Behavior-agnostic estimation of discounted stationary distribution corrections. *Advances in Neural Information Processing Systems*, 32, 2019.
- [32] J. Lee, W. Jeon, B. Lee, J. Pineau, and K.-E. Kim. Optidice: Offline policy optimization via stationary distribution correction estimation. In *International Conference on Machine Learning*, pages 6120–6130. PMLR, 2021.
- [33] R. Zhang, B. Dai, L. Li, and D. Schuurmans. Gendice: Generalized offline estimation of stationary values. *arXiv preprint arXiv:2002.09072*, 2020.
- [34] G.-H. Kim, S. Seo, J. Lee, W. Jeon, H. Hwang, H. Yang, and K.-E. Kim. Demodice: Offline imitation learning with supplementary imperfect demonstrations. In *International Conference on Learning Representations*, 2022.

- [35] G.-H. Kim, J. Lee, Y. Jang, H. Yang, and K.-E. Kim. Lobsdice: Offline learning from observation via stationary distribution correction estimation. *Advances in Neural Information Processing Systems*, 35:8252–8264, 2022.
- [36] T. Haarnoja, A. Zhou, P. Abbeel, and S. Levine. Soft actor-critic: Off-policy maximum entropy deep reinforcement learning with a stochastic actor. In *International conference on machine learning*, pages 1861–1870. PMLR, 2018.
- [37] S. Fujimoto, H. Hoof, and D. Meger. Addressing function approximation error in actor-critic methods. In *International conference on machine learning*, pages 1587–1596. PMLR, 2018.
- [38] M. L. Puterman. *Markov decision processes: discrete stochastic dynamic programming*. John Wiley & Sons, 2014.
- [39] R. S. Sutton and A. G. Barto. *Reinforcement learning: An introduction*. MIT press, 2018.
- [40] Z. Liu, Y. Zhang, Z. Fu, Z. Yang, and Z. Wang. Provably efficient generative adversarial imitation learning for online and offline setting with linear function approximation. *arXiv preprint arXiv:2108.08765*, 2021.
- [41] B. DeMoss, P. Duckworth, N. Hawes, and I. Posner. Ditto: Offline imitation learning with world models. *arXiv preprint arXiv:2302.03086*, 2023.
- [42] I. Kostrikov, O. Nachum, and J. Tompson. Imitation learning via off-policy distribution matching. *arXiv preprint arXiv:1912.05032*, 2019.
- [43] O. Nachum and B. Dai. Reinforcement learning via fenchel-rockafellar duality. *arXiv preprint arXiv:2001.01866*, 2020.
- [44] I. Kostrikov, A. Nair, and S. Levine. Offline reinforcement learning with implicit q-learning. *arXiv preprint arXiv:2110.06169*, 2021.
- [45] A. Nair, A. Gupta, M. Dalal, and S. Levine. Awac: Accelerating online reinforcement learning with offline datasets. *arXiv preprint arXiv:2006.09359*, 2020.
- [46] H. Sikchi, W. Zhou, and D. Held. Learning off-policy with online planning. In *Conference on Robot Learning*, pages 1622–1633. PMLR, 2022.
- [47] A. Kumar, R. Agarwal, T. Ma, A. Courville, G. Tucker, and S. Levine. Dr3: Value-based deep reinforcement learning requires explicit regularization. *arXiv preprint arXiv:2112.04716*, 2021.
- [48] K. Zolna, A. Novikov, K. Konyushkova, C. Gulcehre, Z. Wang, Y. Aytar, M. Denil, N. de Freitas, and S. Reed. Offline learning from demonstrations and unlabeled experience. *arXiv preprint arXiv:2011.13885*, 2020.
- [49] D. A. Pomerleau. Efficient training of artificial neural networks for autonomous navigation. *Neural computation*, 3(1):88–97, 1991.
- [50] D. Garg, S. Chakraborty, C. Cundy, J. Song, and S. Ermon. Iq-learn: Inverse soft-q learning for imitation. *Advances in Neural Information Processing Systems*, 34:4028–4039, 2021.
- [51] B. Baker, I. Akkaya, P. Zhokov, J. Huizinga, J. Tang, A. Ecoffet, B. Houghton, R. Sampedro, and J. Clune. Video pretraining (vpt): Learning to act by watching unlabeled online videos. *Advances in Neural Information Processing Systems*, 35:24639–24654, 2022.
- [52] S. Boyd, S. P. Boyd, and L. Vandenberghe. *Convex optimization*. Cambridge university press, 2004.
- [53] B. Eysenbach, S. Levine, and R. R. Salakhutdinov. Replacing rewards with examples: Example-based policy search via recursive classification. *Advances in Neural Information Processing Systems*, 34:11541–11552, 2021.

- 451 [54] S. Fujimoto and S. S. Gu. A minimalist approach to offline reinforcement learning. *Advances*  
452 *in neural information processing systems*, 34:20132–20145, 2021.
- 453 [55] C. Chuck, C. Qi, M. J. Munje, S. Li, M. Rudolph, C. Shi, S. Agarwal, H. Sikchi, A. Peri,  
454 S. Dayal, et al. Robot air hockey: A manipulation testbed for robot learning with reinforcement  
455 learning. *arXiv preprint arXiv:2405.03113*, 2024.
- 456 [56] G. Bradski. The OpenCV Library. *Dr. Dobb's Journal of Software Tools*, 2000.

## 457 Appendix

### 458 6.1 Code Release

459 Our code is attached as part of the supplementary material to ensure reproducibility.

### 460 6.2 Theory

#### 461 6.2.1 Derivation for Action-free distribution matching

462 **Theorem 6.1.** *The dual problem to the primal occupancy matching objective (Equation 4) is given*  
 463 *by the DILO objective in Equation 5. Moreover, as strong duality holds from Slater’s conditions the*  
 464 *primal and dual share the same optimal solution  $d^*$  for any offline transition distribution  $\rho$  and any*  
 465 *choice of mixture distribution ratio  $\beta$ .*

466 We start with the primal objective that matches distributions between the agent’s visitation  $d(s, s', a')$   
 467 and expert’s visitation  $d^E(s, s', a')$ . As before  $\rho$  denotes the visitation distribution of offline data.

$$\min_{\pi} \mathcal{D}_f(\text{Mix}_{\beta}(d^{\pi}(s, s', a'), \rho) \| \text{Mix}_{\beta}(d^E(s, s', a'), \rho)), \quad (7)$$

468 where for any two distributions  $\mu_1$  and  $\mu_2$ ,  $\text{Mix}_{\beta}(\mu_1, \mu_2)$  denotes the mixture distribution with  
 469 coefficient  $\beta \in (0, 1]$  defined as  $\text{Mix}_{\beta}(\mu_1, \mu_2) = \beta\mu_1 + (1 - \beta)\mu_2$ .

470 Formulating the objective as a constrained objective in agent’s visitation distribution  $d$  allows us to  
 471 create a primal objective that is a convex program. This is crucial in subsequently creating a dual  
 472 objective that is unconstrained and easy to optimize.

$$\begin{aligned} & \max_{d \geq 0} -\mathcal{D}_f(\text{Mix}_{\beta}(d, \rho) \| \text{Mix}_{\beta}(d^E, \rho)) \\ \text{s.t. } & \sum_{a''} d(s', s'', a'') = (1 - \gamma)d_0(s', s'') + \gamma \sum_{s, a' \in \mathcal{S} \times \mathcal{A}} d(s, s', a') p(s'' | s', a'), \quad \forall s', s'' \in \mathcal{S} \times \mathcal{S}. \end{aligned} \quad (8)$$

473 where the constraints above dictate the conditions that any valid visitation distribution  $d(s', s'')$  needs  
 474 to satisfy and are our proposed modifications to the commonly known *bellman flow constraints*.

475 Below we outline the derivation of how these specific constraints with the mixture distribution  
 476 matching objective allows us to create a dual objective that is independent of expert’s actions.  
 477 Applying Lagrangian duality to the above constrained distribution matching objective, we can convert  
 478 it to an unconstrained problem with dual variables  $V(s, s')$  defined for all  $s, s' \in \mathcal{S} \times \mathcal{S}$ :

$$\begin{aligned} & \max_{d \geq 0} \min_{V(s', s'')} -D_f(\text{Mix}_{\beta}(d, \rho)(s, s', a') \| \text{Mix}_{\beta}(d^E, \rho)(s, s', a')) \\ & + \sum_{s', s''} V(s', s'') \left( (1 - \gamma)d_0(s', s'') + \gamma \sum_{s, a'} d(s, s', a') p(s'' | s', a') - \sum_a d(s', s'', a'') \right) \end{aligned} \quad (9)$$

$$\begin{aligned} & = \max_{d \geq 0} \min_{V(s, s')} (1 - \gamma) \mathbb{E}_{d_0(s, s')} [V(s, s')] + \mathbb{E}_{s, s', a' \sim d} \left[ \gamma \sum_{s''} p(s'' | s', a') V(s', s'') - V(s, s') \right] \\ & - D_f(\text{Mix}_{\beta}(d, \rho)(s, s', a') \| \text{Mix}_{\beta}(d^E, \rho)(s, s', a')) \end{aligned} \quad (10)$$

479 where the last equation uses a change of variable from  $s', s''$  to  $s, s'$  without loss of generality. Using  
 480 a simple algebraic manipulation below, we can get rid of the inner maximization. We add and subtract

the terms shown below:

$$\begin{aligned}
&= \max_{d \geq 0} \min_{V(s, s')} \beta(1 - \gamma) \mathbb{E}_{d_0(s, s')} [V(s, s')] \\
&\quad + \beta \mathbb{E}_{s, s', a' \sim d} \left[ \gamma \sum_{s''} p(s'' | s', a') V(s', s'') - V(s, s') \right] \\
&\quad + (1 - \beta) \mathbb{E}_{s, s', a' \sim \rho} \left[ \gamma \sum_{s''} p(s'' | s', a') V(s', s'') - V(s, s') \right] \\
&\quad - (1 - \beta) \mathbb{E}_{s, a, g \sim \rho} \left[ \gamma \sum_{s''} p(s'' | s', a') V(s', s'') - V(s, s') \right] \\
&\quad - D_f(\text{Mix}_\beta(d, \rho)(s, s', a') \parallel \text{Mix}_\beta(d^E, \rho)(s, s', a'))
\end{aligned} \tag{11}$$

As strong duality holds using Slater's conditions [52] (see [43] for a detailed account of strong duality in RL under visitation distributions). Using the fact that strong duality holds in this problem we can swap the inner max and min and rewrite an equivalent maximization under the mixture distribution:

$$\begin{aligned}
&= \min_{V(s, s')} \max_{\text{Mix}_\beta(d, \rho)(s, s', a') \geq 0} \beta(1 - \gamma) \mathbb{E}_{d_0(s, s')} [V(s, s')] \\
&\quad + \beta \mathbb{E}_{s, s', a' \sim d} \left[ \gamma \sum_{s''} p(s'' | s', a') V(s', s'') - V(s, s') \right] \\
&\quad + (1 - \beta) \mathbb{E}_{s, s', a' \sim \rho} \left[ \gamma \sum_{s''} p(s'' | s', a') V(s', s'') - V(s, s') \right] \\
&\quad - (1 - \beta) \mathbb{E}_{s, s', a' \sim \rho} \left[ \gamma \sum_{s''} p(s'' | s', a') V(s', s'') - V(s, s') \right] \\
&\quad - D_f(\text{Mix}_\beta(d, \rho)(s, s', a') \parallel \text{Mix}_\beta(d^E, \rho)(s, s', a'))
\end{aligned} \tag{12}$$

In the following derivation, we will show that the inner maximization in Eq 12 has a closed form solution even when adhering to the non-negativity constraints. Let  $y(s, s', a') = \mathbb{E}_{s'' \sim p(s', a')} [V(s', s'')] - V(s, s')$ .

$$\begin{aligned}
&\max_{\text{Mix}_\beta(d, \rho)(s, s', a') \geq 0} \mathbb{E}_{s, s', a' \sim \text{Mix}_\beta(d, \rho)(s, s', a')} \left[ \gamma \sum_{s''} p(s'' | s', a') V(s', s'') - V(s, s') \right] \\
&\quad - D_f(\text{Mix}_\beta(d, \rho)(s, s', a') \parallel \text{Mix}_\beta(d^E, \rho)(s, s', a'))
\end{aligned}$$

Now to solve this constrained optimization problem we create the Lagrangian dual and study the KKT (Karush–Kuhn–Tucker) conditions. Let  $w(s, s', a') \triangleq \frac{\text{Mix}_\beta(d, \rho)(s, s', a')}{\text{Mix}_\beta(d^E, \rho)(s, s', a')}$ , then the constraint  $\text{Mix}_\beta(d, \rho)(s, s', a') \geq 0$  holds if and only if  $w(s, s', a') \geq 0 \quad \forall s, s', a'$ .

$$\begin{aligned}
&\max_{w(s, s', a')} \max_{\lambda \geq 0} \mathbb{E}_{s, s', a' \sim \text{Mix}_\beta(d^E, \rho)(s, s', a')} [w(s, s', a') y(s, s', a')] - \mathbb{E}_{\text{Mix}_\beta(d^E, \rho)(s, s', a')} [f(w(s, s', a'))] \\
&\quad + \sum_{s, s', a'} \lambda (w(s, s', a') - 0)
\end{aligned} \tag{13}$$

Since strong duality holds, we can use the KKT constraints to find the solutions  $w^*(s, s', a')$  and  $\lambda^*(s, s', a')$ .

- **Primal feasibility:**  $w^*(s, s', a') \geq 0 \quad \forall s, s', a'$
- **Dual feasibility:**  $\lambda^* \geq 0 \quad \forall s, s', a'$



- 495 • **Stationarity:**  $\text{Mix}_\beta(d^E, \rho)(s, s', a')(-f'(w^*(s, s', a')) + y(s, s', a') + \lambda^*(s, s', a')) =$   
 496  $0 \quad \forall s, s', a'$
- 497 • **Complementary Slackness:**  $(w^*(s, s', a') - 0)\lambda^*(s, s', a') = 0 \quad \forall s, s', a'$

498 Using stationarity we have the following:

$$f'(w^*(s, s', a')) = y(s, s', a') + \lambda^*(s, s', a') \quad \forall s, s', a' \quad (14)$$

499 Now using complementary slackness, only two cases are possible  $w^*(s, s', a') \geq 0$  or  $\lambda^*(s, s', a') \geq$   
 500  $0$ .

501 Combining both cases we arrive at the following solution for this constrained optimization:

$$w^*(s, s', a') = \max\left(0, f'^{-1}(y(s, s', a'))\right) \quad (15)$$

502 Using the optimal closed-form solution ( $w^*$ ) for the inner optimization in Eq. (12) we obtain

$$\begin{aligned} & \min_{V(s, s')} \beta(1 - \gamma)\mathbb{E}_{d_0(s, s')}[V(s, s')] \\ & + \mathbb{E}_{s, s', a' \sim \text{Mix}_\beta(d^E, \rho)(s, s', a')} \left[ \max\left(0, (f')^{-1}(y(s, s', a'))\right) y(s, s', a') - \alpha f\left(\max\left(0, (f')^{-1}(y(s, s', a'))\right)\right) \right] \\ & - (1 - \beta)\mathbb{E}_{s, a \sim \rho} \left[ \gamma \sum_{s'} p(s'|s, a) V(s', s'') - V(s, s') \right] \end{aligned} \quad (16)$$

503 For deterministic dynamics, this reduces to the following simplified objective:

$$\begin{aligned} & \min_{V(s, s')} \beta(1 - \gamma)\mathbb{E}_{d_0(s, s')}[V(s, s')] \\ & + \mathbb{E}_{s, s', a' \sim \text{Mix}_\beta(d^E, \rho)(s, s', a')} \left[ \max\left(0, (f')^{-1}(y(s, s', a'))\right) y(s, s', a') - f\left(\max\left(0, (f')^{-1}(y(s, s', a'))\right)\right) \right] \\ & - (1 - \beta)\mathbb{E}_{s, a \sim \rho} [\gamma V(s', s'') - V(s, s')] \end{aligned} \quad (17)$$

504 where  $y(s, a, g) = \gamma V(s', s'') - V(s, s')$ .

## 505 6.2.2 What does the utility function $V^*(s, s')$ represent?

506 Prior work [43] shows that for the regularized RL problem

$$\begin{aligned} & \max_{d \geq 0} \mathbb{E}_{d(s, a)}[r(s, a)] - \alpha D_f(d(s, a) || d^O(s, a)) \\ & \text{s.t. } \sum_{a \in \mathcal{A}} d(s, a) = (1 - \gamma)d_0(s) + \gamma \sum_{(s', a') \in \mathcal{S} \times \mathcal{A}} d(s', a') p(s|s', a'), \quad \forall s \in \mathcal{S}. \end{aligned} \quad (18)$$

507 the dual optimizes for a Lagrangian variable  $V$  that represents a regularized optimal value function.  
 508 This insight directly extends to our work with reward function set to zero, our Lagrangian variable  
 509 learns only the regularized visitation probabilities under optimal policy.

510 It is easy to see why this is the case using the previous derivation. Following the derivation from the  
 511 previous section, note that we had rewritten the inner maximization w.r.t the visitation distribution  
 512  $d$ , thus effectively getting rid of manipulating visitation distributions in the final objective. Our  
 513 derivation above uses the following substitution shown in Eq 15 that holds as part of the closed form  
 514 solution w.r.t inner maximization:

$$\frac{\text{Mix}_\beta(d, \rho)(s, s', a')}{\text{Mix}_\beta(d^E, \rho)(s, s', a')} = \max\left(0, f'^{-1}(y(s, s', a'))\right) \quad (19)$$

515 where  $y = \gamma V(s', s'') - V(s, s')$ . For deterministic dynamics, at convergence, the following holds  
 516 for all  $s, s', a'$  where  $d^*(s, s', a') > 0$ :

$$f'^{-1}(\gamma V^*(s', s'') - V^*(s, s')) = \frac{\text{Mix}_\beta(d^*, \rho)(s, s', a')}{\text{Mix}_\beta(d^E, \rho)(s, s', a')} \quad (20)$$

517 implying:

$$(\gamma V^*(s', s'') - V^*(s, s')) = f' \left( \frac{\text{Mix}_\beta(d^*, \rho)(s, s', a')}{\text{Mix}_\beta(d^E, \rho)(s, s', a')} \right) = -r_i(s, s', a') \quad (21)$$

518 The above relation makes the the interpretation of  $V^*(s, s')$  clear.  $(V^*(s, s') - \gamma V^*(s', s''))$  de-  
 519 notes the implied reward function  $r_i(s, s', a')$  under which  $V^*$  computes the maximum cumulative  
 520 expected return, where  $a'$  is the action that leads to  $s''$ . As shown above the the implied reward  
 521 function  $r_i(s, s', a') = -f' \left( \frac{\text{Mix}_\beta(d^*, \rho)(s, s', a')}{\text{Mix}_\beta(d^E, \rho)(s, s', a')} \right)$  is the divergence between expert stationary visita-  
 522 tion distribution and agent's stationary visitation that is obtained after taking the action  $a'$  from  $s'$   
 523 and then acting optimally to match the expert visitation distribution. Note that the function  $f'$  is  
 524 non-decreasing as the function  $f$  is convex from definition of  $f$ -divergences.

### 525 6.2.3 Analytical form of $f_p^*$ for $\chi^2$ divergence

526 For  $\chi^2$  divergence, the generator function  $f(x) = (x - 1)^2$ .  $f'(x) = 2(x - 1)$  and correspondingly  
 527  $f'^{-1}(x) = \frac{x}{2} + 1$ . Substituting  $f'^{-1}(x)$  in definition of  $f_p^*$ :

$$f_p^*(x) = \max(0, f'^{-1}(x))(x) - f(\max(0, f'^{-1}(x))) \quad (22)$$

528 Since  $x$  we substitute takes the form of residual  $\text{residual} = \gamma \mathbb{E}_{s'' \sim p(\cdot | s', a')} [V(s', s'')] - V(s, s')$ ,  
 529 the below pseudocode shows the implementation of  $f_p^*$  for DIL0.

```
530 1 def f_star_p(self, residual, type='chi_square'):
531 2     if type=='chi_square':
532 3         omega_star = torch.max(residual / 2 + 1, torch.zeros_like(
533         residual))
534 4         return residual * omega_star - (omega_star - 1)**2
```

### 535 6.2.4 Intuitive understanding of DIL0

536 To better understand this objective's behavior we consider the last two terms from Eq 5 in its expanded  
 537 form below. We ignore the first term as it is simply pushing down  $Q$ -values at initial distribution of  
 538 states, to prevent overestimation when learning from offline datasets.

$$\begin{aligned} \beta \mathbb{E}_{s, s', s'' \sim \tilde{d}^E} [f_p^*(\gamma V(s', s'') - V(s, s'))] + (1 - \beta) * \mathbb{E}_{s, s', s'' \sim \rho} [f_p^*(\gamma V(s', s'') - V(s, s'))] \\ - (1 - \beta) \mathbb{E}_{s, s', a' \sim \rho} [\gamma \mathbb{E}_{s'' \sim p(\cdot | s', a')} [V(s', s'')] - V(s, s')], \end{aligned} \quad (23)$$

539 Denote  $r(s, s', a^E) = V(s, s') - \gamma V(s', s'')$  as the implicit expert reward of under a learned  $Q$ -  
 540 function. The objective presents a clear intuition when we study the objective's behavior in different  
 541 situations individually: (a) For samples from  $\rho$ , the objective pushes down the implicit reward to 0 as  
 542 shown below:

$$\min_r \mathcal{L}(r) = \begin{cases} (1 - \beta) \frac{r^2}{4}, & \text{if } r < 2, \\ (1 - \beta)r & \text{otherwise.} \end{cases} \quad (24)$$

543 (b) For samples from the expert distribution  $\tilde{d}^E$ , the objective ensures that reward is greater than  
 544 equal to 2

$$\min_r \mathcal{L}(r) = \begin{cases} \beta(\frac{r^2}{4} - r), & \text{if } r < 2, \\ 0 & \text{otherwise.} \end{cases} \quad (25)$$

545 It becomes clear now that DIL0 is implicitly learning a valid reward function that ensures higher  
 546 discounted return for the expert compared to the suboptimal dataset by shaping  $Q$ -values directly.

## 547 6.3 Implementation

548 The algorithm for DIL0 can be found in Algorithm 1. We base the DIL0 implementation on the  
 549 official implementation of pytorch-IQL <https://github.com/gwthomas/IQL-PyTorch/tree/main> that is  
 550 based on IQL [44]. We keep the same network architecture as the original code and do not vary it  
 551 across environments.

### 6.3.1 Imitation Learning with Proprioceptive Observations

Our experiment design is based on the benchmark from [13, 28] but we explain the setup here for completeness.

**Environments:** For the offline imitation learning experiments we focus on 9 locomotion and manipulation environments from the MuJoCo physics engine [18] comprising of Hopper, Walker2d, HalfCheetah, Ant, Kitchen, Pen, Door and Hammer to make a total of 24 datasets. The MuJoCo environments used in this work are licensed under CC BY 4.0 and the datasets used from D4RL are also licensed under Apache 2.0.

**Suboptimal Datasets:** We use the offline imitation learning benchmark from [28] that utilizes offline datasets consisting of environment interactions from the D4RL framework [19]. Specifically, suboptimal datasets are constructed following the composition protocol introduced in SMODICE [13]. The suboptimal datasets, denoted as 'random+expert', 'random+few-expert', 'medium+expert', and 'medium+few-expert' combine expert trajectories with low-quality trajectories obtained from the "random-v2" and "medium-v2" datasets, respectively. For locomotion tasks, the 'random/medium+expert' dataset contains a mixture of some number of expert trajectories ( $\leq 200$ ) and  $\approx 1$  million transitions from the "x" dataset. The 'x+few-expert' dataset is similar to 'x+expert', but with only 30 expert trajectories included. For manipulation environments we consider only 30 expert trajectories mixed with the complete 'x' dataset of transitions obtained from D4RL.

**Expert Observation Dataset:** To enable imitation learning from observation, we use 1 expert observation trajectory obtained from the "expert-v2" dataset for each respective environment.

**Baselines:** To benchmark and analyze the performance of our proposed methods for offline imitation learning with suboptimal data, we consider different representative baselines in this work: BC [49], SMODICE [13], RCE [53], ORIL [48], IQLearn [50], ReCOIL [28]. SMODICE has been shown to be competitive [13] to DEMODICE [34] and hence we exclude it from comparison. SMODICE is an imitation learning method based on the dual framework, that optimizes an upper bound to the true imitation objective. ORIL adapts generative adversarial imitation learning (GAIL) [9] algorithm to the offline setting, employing an offline RL algorithm for policy optimization. The RCE baseline combines RCE, an online example-based RL method proposed by Eysenbach et al. [53]. RCE also uses a recursive discriminator to test the proximity of the policy visitations to successful examples. [53], with TD3-BC [54]. Both ORIL and RCE utilize a state-based discriminator similar to SMODICE, and TD3-BC serves as the offline RL algorithm. All the compared approaches only have access to the expert state-action trajectory.

The open-source implementations of the baselines SMODICE, RCE, and ORIL provided by the authors [13] are employed in our experiments. We use the hyperparameters provided by the authors, which are consistent with those used in the original SMODICE paper [13], for all the MuJoCo locomotion and manipulation environments.

In our set of environments, we keep the same hyper-parameters across tasks - locomotion, adroit manipulation, and kitchen manipulation. We train until convergence for all algorithms including baselines and we found the following timesteps to be sufficient for different set of environments: Kitchen: 1e6, Few-expert-locomotion: 500k, Locomotion: 300k, Manipulation: 500k

We keep a constant batch size of 1024 across all environments. For all tasks, we average mean returns over 10 evaluation trajectories and 7 random seeds. Full hyper-parameters we used for experiments are given in Table 2. For policy update, using Value Weighted Regression, we use the temperature  $\tau$  to be 3 for all environments.

Hyperparameters for our proposed off-policy imitation learning method DIL0 are shown in Table 2.

### 6.3.2 LfO with Image Observations

We use robomimic [20] for our imitation with image observations experiments. The following two environments are used here (the description is taken from their paper and written here for conciseness):

| Hyperparameter                                | Value     |
|-----------------------------------------------|-----------|
| Policy learning rate                          | 3e-4      |
| Value learning rate                           | 3e-4      |
| $f$ -divergence                               | $\chi^2$  |
| max-clip (Value clipping for policy learning) | 100       |
| MLP layers                                    | (256,256) |
| $\beta$ (mixture ratio)                       | 0.5       |
| $\eta$ (orthogonal gradient descent)          | 0.5       |
| $\tau$ (policy temperature)                   | 3         |

Table 2: Hyperparameters for DIL0 in imitation from proprioceptive observations.

**Lift:** Object observations (10-dim) consist of the absolute cube position and cube quaternion (7-dim), and the cube position relative to the robot end effector (3-dim). The cube pose is randomized at the start of each episode with a random z-rotation in a small square region at the center of the table.

**Can** Object observations (14-dim) consist of the absolute can position and quaternion (7-dim), and the can position and quaternion relative to the robot end effector (7-dim). The can pose is randomized at the start of each episode with a random z-rotation anywhere inside the left bin.

Robomimic provides three datasets and two modalities of observation (Proprioceptive, Images) for both environments above. The datasets are denoted by - MH (Multi-human), MG (Machine Generated), PH(Proficient-human). We use the MG and MH datasets as the suboptimal datasets in our task and PH as the source of expert observations. MH and MG datasets consists of 200 trajectories of usually suboptimal nature and we use 50 observation-only trajectory from PH datasets. This task is complex by the fact that expert-level actions are mostly unseen in the suboptimal dataset and the agent needs to learn the best actions that matches expert visitation from the suboptimal dataset. We implement all algorithms in the Robomimic codebase without any change in network architecture, data-preprocessing or learning hyperparameters. We tune algorithm specific hyperparameters in a course grid for BCO, SMODICE, and DIL0 to compare the best performance of methods independent of hyperparameters. For BCO, we tune the inverse dynamics model learning epochs between [1,5,10]. For SMODICE, we tuned discriminator learning epochs between [1,5], and gradient penalty between [1,5,10,20]. To control overestimation due to learning with offline datasets in DIL0 we consider a linear weighting  $\alpha$  between the optimism and pessimism terms in Eq 5 inspired by prior work [28] as follows:

$$\min_Q (1 - \lambda)\beta(1 - \gamma)\mathbb{E}_{\tilde{d}_0} [V(s, s')] + \lambda\mathbb{E}_{s, s', a' \sim \text{Mix}_{\beta}(\tilde{d}^E, \rho)} [f_p^*(\gamma\mathbb{E}_{s'' \sim p(\cdot|s', a')} [V(s', s'')] - V(s, s'))] - \lambda(1 - \beta)\mathbb{E}_{s, s', a' \sim \rho} [\gamma\mathbb{E}_{s'' \sim p(\cdot|s', a')} [V(s', s'')] - V(s, s')],$$

The hyperparameters used for DIL0 can be found in Table 3. For the architecture specific hyperparameters we refer the readers to [20].

| Hyperparameter                                | Value |
|-----------------------------------------------|-------|
| max-clip (Value clipping for policy learning) | 100   |
| $\lambda$ (pessimism parameter)               | 0.7   |
| $\beta$ (mixture ratio)                       | 0.5   |
| $\eta$ (orthogonal gradient descent)          | 0.5   |
| $\tau$ (policy temperature)                   | 3     |

Table 3: Hyperparameters for DIL0 in imitation from image observations.

622

## 6.4 Robot Manipulation Experiments

Our setup for manipulation experiments is inspired by the robot air hockey environment [55] for applying DIL0 to physical robotics settings. Our setup utilizes a Universal Robotics 5 kilogram e-series (UR5e) 6-degree of freedom robotic arm on a fixed mount, a Robotiq parallel jaw gripper, a 1.93m  $\times$  0.76m Wind Chill air hockey table which is tilted at a 5.5 degree angle, and an overhead

628 Sony Playstation Eye, a high framerate camera, which gathers  $640 \times 480$  frames at 60 FPS, mounted  
 629 to the ceiling to have a full view of the table. The paddle that is held by the robot end effector is  
 630 9.5cm in diameter and the puck is 6.3cm.

631 In this setup, the negative  $x$   
 632 direction is oriented along  
 633 the table, and the  $y$  is  
 634 across the table. The ac-  
 635 tion space for the arm uti-  
 636 lizes pose control in  $x, y$   
 637 through an inverse kine-  
 638 matics controller accessi-  
 639 ble through the Universal

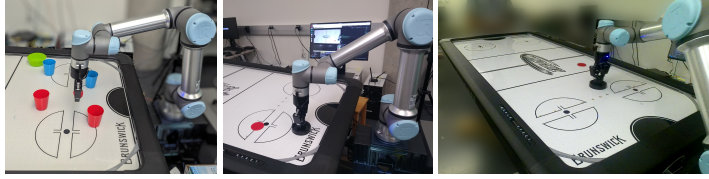

Figure 5: Tasks: Left: Place object and avoid obstacles. Center: Stationary Puck Striking. Right: Dynamic Puck Hitting

640 robotics real-time data exchange interface. Utilizing the serving command, the arm is  
 641 controlled using delta positions clipped between 26cm in the  $x$  direction and 13cm in  
 642 the right direction. These control limits are specified to prevent the robot from trigger-  
 643 ing force limits, which results in an emergency stop. Actions are taken at a 20Hz fre-  
 644 quency to allow for rapid response to dynamic elements, such as hitting a falling puck.

645 The position and velocity of the end effector  
 646 can be recovered through the real-time data ex-  
 647 change, but other objects like the puck or the  
 648 hand require identification. This work utilizes  
 649 an overhead camera running at 60Hz to locate  
 650 these objects using a vision pipeline that relies  
 651 on hue saturation value segmentation followed  
 652 by object identification. This gives an  $x_c, y_c$  co-  
 653 ordinate in camera space, which we convert via  
 654 OpenCV [56] homography to robot coordinates.  
 655 This homography is computed by mapping the  
 656 end effector positions given by the robot sensors  
 657 to visual locations from the camera.

658 We apply imitation learning from observations  
 659 on several tasks built on top of the above robot  
 660 setup. The following experiments are described  
 661 here:

662 **Safe object manipulation:** This task involves  
 663 moving a strawberry to a bowl while avoiding  
 664 four cups placed in the workspace of the robot.  
 665 The bowl is placed in the top right corner of the  
 666 workspace, and the cups are placed in fixed loca-  
 667 tions. The success metric is the robot stopping  
 668 above the bowl while making no contact with any of the cups. The test set involves 10 random  
 669 starting locations for the end effector that are fixed between assessments. The observation space is the  
 670 2D end effector position, and the strawberry is initialized inside the gripper. Our suboptimal dataset  
 671 consists of 50 trajectories of 100 time steps on average where the robot is initialized in a random  
 672 location, and the human moves the arm to a random different location, ignoring the positions of the  
 673 cups or the bowl. In this setting, we investigated the following expert data, visualized in Figure 5:

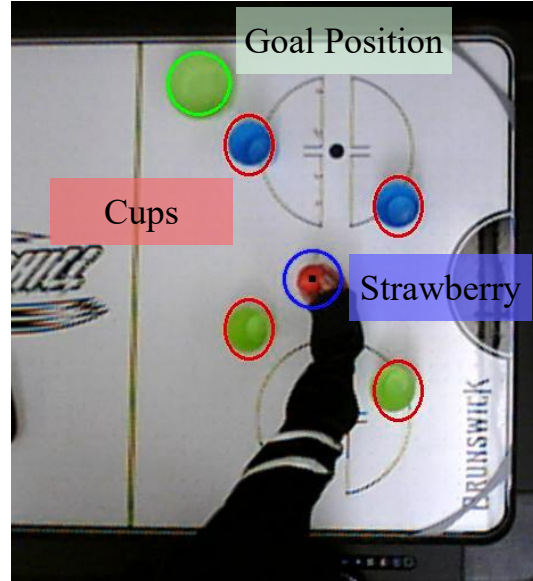

Figure 6: **Cross Embodiment Demonstration:** Tracking of the strawberry and obstacles for learning action-free.

- 674 • **Few Trajectories:** The expert data is drawn from a set where the expert is initialized in a  
 675 random location, sometimes touching an obstacle, and must use the teleoperation system to  
 676 avoid the obstacle and reach the goal. In this setting we used 15 expert trajectories.



- **Fixed start:** The expert is initialized at the opposite corner of the workspace, and navigates to the goal location following different paths using teleoperation. In this setting we used 15 trajectories.
- **Few Uniform:** Uses the same expert data as the Few Trajectories setting, but the dataset consists of randomly samples 300 transitions, where one trajectory is approximately 60 transitions of data.
- **Cross Embodiment Few/Fixed/Uniform:** The expert is a person holding the strawberry in his/her hand, visualized in Figure 6. They then move the strawberry tracked by the camera to the goal location while avoiding the obstacles, starting from random/fixed locations with 15 expert trajectories respectively or uniform with 300 transitions.

**Stationary Striking:** This task involves moving the end effector to strike a stationary puck. The success metric is the robot touching the puck. The test set involves 10 initializations of the puck position across the length of the table. To ensure uniformity across evaluations, the set of initialization locations of the puck are fixed across methods. The end effector is initialized at 0.38m from the base in the center of the table, so a success strike does not require backward motion. The observation space is the 2D end effector position and the tracked position of the puck. Our suboptimal dataset consists of 50 trajectories of 75 time steps on average where the robot is initialized at the start position, and the human moves the arm in a random, vaguely striking pattern.

In this setting we used an expert dataset of 400 trajectories where the expert uses mouse teleoperation to strike the puck. The expert efficiently strikes the puck in a single motion. We visualize the expert striking and the puck position in Figure 5. We show the learned action vectors for all algorithms and tasks fixed start (Figure 9), Few Uniform (Figure 8) and Few trajectories (Figure 10).

**Dynamic Hitting:** This task involves hitting a puck dropped from the top of the table. Because the table is set at an angle, this will cause the puck to fall with increasing acceleration towards the opposite side. The setup is visualized in Figure 5. The test set involves 10 initializations of the puck position dropped from positions across the length of the top of the table. The locations of the 10 puck drops are fixed using indicators across methods to give fair evaluation, and the arm is initialized in the center of the table, 0.68m from the base. The observation space is the 2D end effector position and 2D end effector velocity and the history of the last 5 tracked positions of the puck relative to the position of the end effector. Our suboptimal dataset consists of 50 trajectories of 200 time steps on average where the robot is initialized at the start position, and the human moves the arm around the puck without striking it.

We utilize two success metrics for this task: 1) touching: a trajectory is considered successful if the agent touches the puck. 2) hitting: the puck must have velocity in the opposite direction that it was dropped. This task is especially challenging for existing methods because of the long sequence of actions necessary to position the paddle properly, and the high level of both precision and timing: even a few millimeters of error or a movement at the wrong time will result in a failure, especially for hitting. Previous work has observed that this task is challenging even for humans, who often require several tries of practice, and many dataset trajectories consist of many inaccurate hits. In this domain, Behavior cloning only achieves 30% success at touching the puck, and Implicit Q-learning, a popular offline RL method, can only achieve 60% success, even though it employs a hand-designed reward function.

We used the implementation details from the proprioception task with the difference that in all the real-robot tasks we tune the following parameters across different methods: For BCO, we tune the inverse dynamics model learning epochs between [1,5,10]. For SMODICE, we tuned discriminator learning epochs between [1,5], and gradient penalty between [1,5,10,20]. For DIL0 we tune the conservatism parameter from previous section between [0.5,0.6,0.7,0.8].

In this domain, these challenges appear to be empirically validated in the performance of the baseline methods. We hypothesize that the accumulation of error over long horizons in other learning from observation methods results in poor performance, as visualized in Table 3 and Figure 4. For methods

727 like BCO, learning the necessary inverse dynamics to interpolate the long sequence of actions for a  
 728 successful strike is impractical, resulting in behavior that appears listless. On the other hand, while  
 729 the SMODICE discriminator rewards are able to occasionally match the visitation distribution of  
 730 the expert, there is an exponential explosion of possible combinations of puck history and paddle  
 731 positions, resulting in poor generalization: on the left half of the table, SMODICE is unable to hit the  
 732 puck.

733 The hitting scenario involves two settings, both using mouse teleoperation to control the puck: one  
 734 where the human strikes the puck only once and then the trajectory ends, which utilizes a dataset  
 735 of 50 trajectories, and an expert dataset of 850 trajectories where the human keeps hitting the puck  
 736 repeatedly for up to 2000 timesteps. The task is challenging for human, so trajectories average only  
 737 500 timesteps and cleaned so that human mistakes are removed from the expert dataset. We visualize  
 738 the expert hitting and the puck position in Figure 7.

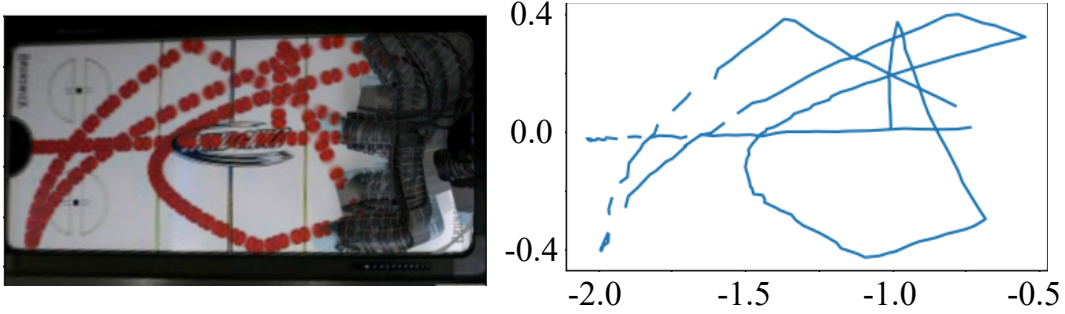

Figure 7: **Expert Hitting:** Visualization of one trajectory of puck tracking and hitting by the expert. **Right:** stacked frames of the environment. **Left:** puck position in robot coordinates

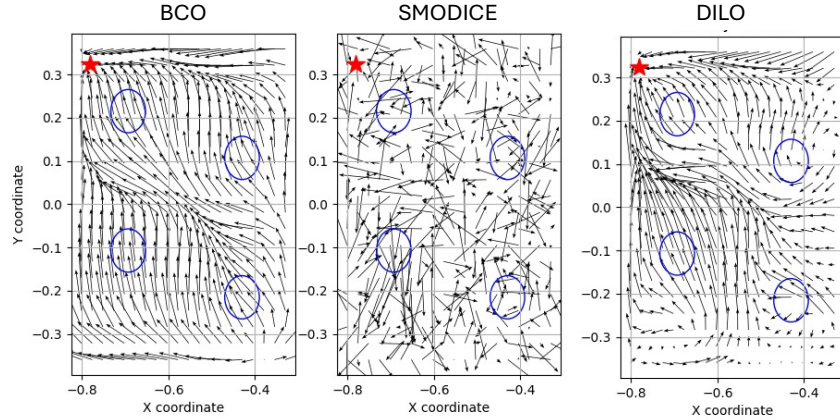

Figure 8: Action Vectors qualitatively showing the next x-y action for the safe manipulation with uniform sampled transitions. BCO generalizes incorrectly at a number of locations producing policies that hit obstacles. DILO learns to mimic expert’s intent better demonstrating signs that it has learned to avoid obstacles by the arrows around

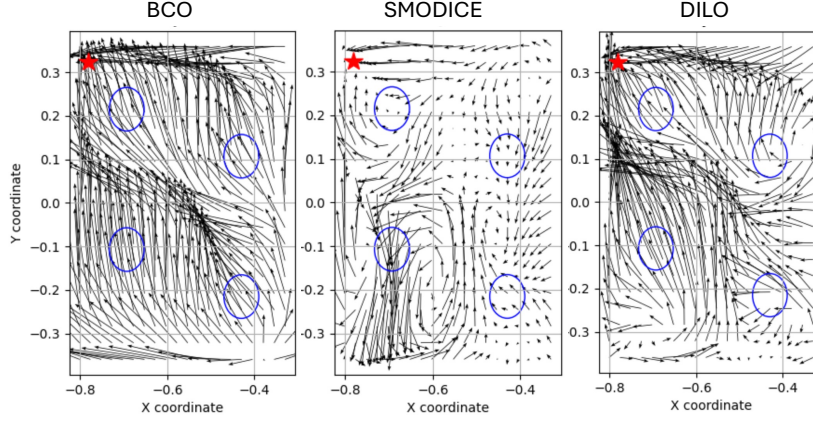

Figure 9: Action Vectors qualitatively showing the next x-y action for the safe manipulation with fixed start state. BCO generalizes incorrectly at a number of locations producing policies that hit obstacles. DILO learns to mimic expert’s intent better demonstrating signs that it has learned to avoid obstacles by the arrows around

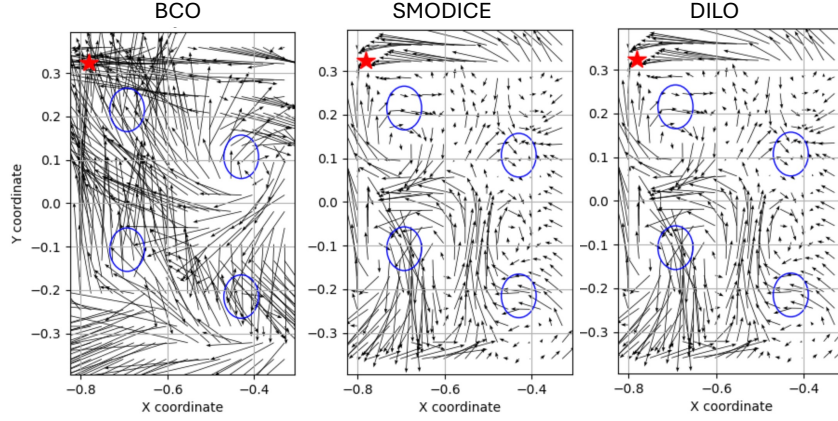

Figure 10: Action Vectors qualitatively showing the next x-y action for the safe manipulation with few trajectories. BCO generalizes incorrectly at a number of locations producing policies that hit obstacles. DILO learns to mimic expert’s intent better demonstrating signs that it has learned to avoid obstacles by the arrows around

## 6.5 Limitations

Learning from Observation is a challenging setting, and while DILO makes some key assumptions in order to achieve good performance. First, matching distributions becomes exponentially more challenging in the dimensionality of the state space. In this work, while DILO outperforms baselines in the Expert Image observations, it still shows limited performance. Second, while learning from observations opens the door for good performance without expert actions, the expert observation space must match that of the agent. In some video settings, this is not the case ex. the agent might use a fixed camera when the human is egocentric, or vice versa. Finally, DILO utilizes the conservatism parameter  $\tau$  to regulate the degree of extrapolation from the algorithm. In some settings, the values can diverge, resulting in  $V^*$  taking on values that might be too large to be used for learning the downstream policy. Adaptively selecting  $\tau$  to maximize extrapolation while avoiding divergence is an area of action investigation.

### 6.5.1 Failure Cases

While DILO outperforms other methods in overall success rate, the failure modes can differ. In general, DILO tends to be conservative in what actions it takes, learning motions that might be slower than BCO, or may get stuck before arriving at the goal. In low observation settings, DILO can also

755 exhibit “dead zone” behavior, where the model becomes mostly unresponsive. Below we detail some  
756 of the exact error modes in particular tasks:

757 **Safe Manipulation:** While DIL0 and BCO have comparable success rates, the two algorithms fail  
758 in different ways. BCO tends to take large actions while ignoring obstacles to reach the goal, while  
759 DIL0 takes more conservative actions. Thus, while BCO might fail by knocking over a cup, DIL0  
760 will tend to fail to reach the goal. Because this is a low data setting, both algorithms BCO and DIL0  
761 can end up coming close to the cups or brushing them gently. As a sidenote, SMODICE fails at even  
762 reaching the goal in most cases in this task, possibly because of this low data setting.

763 **Striking:** This domain is challenging because of the narrow data regime, and all methods tend to  
764 struggle in similar ways. The most common consequence of low data arises through sensitivity to  
765 the  $x$  location of the puck (along the table). While intuitively, striking behavior should be relatively  
766 invariant for a fixed  $y$  (horizontal position on the table), slight variation in  $x$  from the dataset can  
767 result in a policy that moves the arm in the opposite direction of the puck, probably due to errors  
768 in extrapolation. In addition, striking is a dynamic behavior that requires a precise combination of  
769 forward and horizontal actions. Even a slight error in the ratio can result in a near miss. Finally,  
770 DIL0 tends to learn more conservative policies, and in some locations may not not strike the puck  
771 with much force. However, because of the low data coverage, this issue is endemic to all the learned  
772 policies.

773 **Hitting:** The primary challenge of achieving a hit in this task is the precise alignment of the paddle  
774 to the puck. While DIL0 performs well, it is not perfectly accurate, resulting in touches that bounce  
775 off the side of the paddle. This challenge is endemic to all policies. Additionally the conservatism  
776 of DIL0 actions appear when it moves under the puck, where it tends to move slowly, and dropping  
777 the puck too quickly can result in DIL0 failing to reach the puck. As a result, while DIL0 is likely to  
778 succeed at the first hit, it can struggle to generate multiple hits because this can require rapid side to  
779 side movement. These issues are largely endemic to all the learned policies, where SMODICE tends  
780 to be even less precise and BCO struggle to learn to strike, though it can occasionally position under  
781 the puck.

782 Visualizations of the failure modes can be seen in the accompanying video attachment.
